# Supplementary material for: Association of Folic Acid Supplementation in Early Pregnancy with Risk of Gestational Diabetes Mellitus: A Longitudinal Study
Source: MDPI journal article supplement (doi:10.3390/nu14194061), 2022-09-29
Supplement: s1 [file s1]

**Table S1.** Demographic characteristics of the study population (n = 1305).

| Characteristics                        |                | Total            | GDM              | Non-GDM          | $\chi^2/t$ | P      |
|----------------------------------------|----------------|------------------|------------------|------------------|------------|--------|
|                                        |                |                  | N (%)            | N (%)            |            |        |
| Age (years)                            | Means $\pm$ SD | 30.14 $\pm$ 4.01 | 30.73 $\pm$ 3.74 | 29.92 $\pm$ 4.08 | 3.26       | 0.001  |
|                                        | < 25           | 85 (6.51)        | 13 (3.70)        | 72 (7.55)        | 14.19      | 0.003  |
|                                        | 25 ~ 30        | 532 (40.77)      | 126 (35.90)      | 406 (42.56)      |            |        |
|                                        | 30 ~ 35        | 492 (37.70)      | 154 (43.87)      | 338 (35.43)      |            |        |
|                                        | $\geq$ 35      | 196 (15.02)      | 58 (16.52)       | 138 (14.47)      | 5.77       | <0.001 |
| Pre-pregnancy BMI (kg/m <sup>2</sup> ) | Means $\pm$ SD | 21.59 $\pm$ 3.18 | 22.41 $\pm$ 3.15 | 21.28 $\pm$ 3.14 | 38.01      | <0.001 |
|                                        | < 18.5         | 216 (16.55)      | 29 (8.26)        | 187 (19.60)      |            |        |
|                                        | 18.5 ~ 23.9    | 854 (65.44)      | 232 (66.10)      | 622 (65.20)      |            |        |
|                                        | 24.0 ~ 28      | 190 (14.56)      | 77 (21.94)       | 113 (11.84)      |            |        |
|                                        | $\geq$ 28      | 45 (3.45)        | 13 (3.70)        | 32 (3.35)        |            |        |
| Average gestational weeks              | Means $\pm$ SD | 10.98 $\pm$ 1.44 | 10.99 $\pm$ 1.40 | 10.98 $\pm$ 1.45 | 0.07       | 0.947  |
| Gravidity                              | 1              | 486 (42.04)      | 151 (45.21)      | 335 (40.75)      | 5.73       | 0.057  |
|                                        | 2              | 317 (27.42)      | 98 (29.34)       | 219 (26.64)      |            |        |
|                                        | $\geq$ 3       | 353 (30.54)      | 85 (25.45)       | 268 (32.60)      |            |        |
| Parity                                 | 0              | 889 (76.64)      | 261 (77.91)      | 628 (76.12)      | 0.43       | 0.514  |
|                                        | $\geq$ 1       | 271 (23.36)      | 74 (22.09)       | 197 (23.88)      |            |        |
| Smoking                                | Yes            | 32 (2.47)        | 11 (3.15)        | 21 (2.21)        | 0.94       | 0.333  |
|                                        | No             | 1266 (97.53)     | 338 (96.85)      | 928 (97.79)      |            |        |
| Drinking                               | Yes            | 202 (15.71)      | 51 (14.70)       | 151 (16.08)      | 0.137      | 0.545  |
|                                        | No             | 1084 (84.29)     | 296 (85.30)      | 788 (83.92)      |            |        |
| FA supplementation                     | Yes            | 1299 (99.54)     | 349 (99.43)      | 950 (99.58)      | -          | 0.663  |
|                                        | No             | 6 (0.46)         | 2 (0.57)         | 4 (0.42)         |            |        |
| Number of pregnancy                    | Singleton      | 1268 (97.16)     | 339 (96.58)      | 929 (97.38)      | 0.59       | 0.441  |
|                                        | Multiple       | 37 (2.84)        | 12 (3.42)        | 25 (2.62)        |            |        |
| Macrosomia history                     | Yes            | 4 (0.31)         | 1 (0.28)         | 3 (0.31)         | -          | 1.000  |
|                                        | No             | 1301 (99.69)     | 350 (99.72)      | 951 (99.69)      |            |        |
| FBG                                    | Mean $\pm$ SD  | 4.50 $\pm$ 0.45  | 4.81 $\pm$ 0.66  | 4.38 $\pm$ 0.29  | 15.40      | <0.001 |
| 1-h PBG                                | Mean $\pm$ SD  | 8.20 $\pm$ 1.80  | 10.08 $\pm$ 1.67 | 7.42 $\pm$ 1.33  | 26.50      | <0.001 |
| 2-h PBG                                | Mean $\pm$ SD  | 7.03 $\pm$ 1.53  | 8.65 $\pm$ 1.62  | 6.35 $\pm$ 1.00  | 29.71      | <0.001 |

Abbreviations: GDM, gestational diabetes mellitus; BMI, body mass index; FBG, fasting blood glucose; 1-h PBG, 1-hour post blood glucose; 2-h PBG, 2-hour post blood glucose. Mean  $\pm$  SD (standard deviation) for continuous variables, and frequency (n) and percentage (%) for categorical variables.
